# Supplementary material for: Association Between Wait Time for Transcatheter Aortic Valve Replacement and Early Postprocedural Outcomes
Source: PubMed Central journal article supplement — J Am Heart Assoc. 2019 Jan 5;8(1):e010407. doi: 10.1161/JAHA.118.010407 (PMC6405724; doi:10.1161/jaha.118.010407), 2019-01-05
Supplement: JAH3-8-e010407-s001.pdf [file JAH3-8-e010407-s001.pdf]

# **SUPPLEMENTAL MATERIAL**

**Table S1. Cox models for Mortality within 30-day Post-TAVR Adjusted for Clinical Variables.**

| <b>Parameter</b> | <b>HR (95%CI)</b> | <b>P-value</b> |
|------------------|-------------------|----------------|
| Wait time        | 1 (0.99-1.0)      | 0.01           |
| Age              | 1.00 (0.97-1.03)  | 0.99           |
| Female, sex      | 1.19 (0.89-1.58)  | 0.23           |
| Rural Resident   | 1.60 (1.27-2.01)  | <.001          |
| Charlson Score   | 1.07 (0.97-1.18)  | 0.18           |
| Frailty          | 1.53 (1.03-2.27)  | 0.04           |
| HF               | 1.33 (0.88-2.01)  | 0.18           |
| DLP              | 1.00 (0.70-1.43)  | 0.99           |
| Dementia         | 1.00 (0.48-2.38)  | 0.87           |
| DM               | 1.03 (0.78-1.35)  | 0.84           |
| HTN              | 1.40 (0.46-4.28)  | 0.55           |
| COPD             | 1.08 (0.81-1.45)  | 0.60           |
| Malignancy       | 0.87 (0.44-1.69)  | 0.67           |
| Renal disease    | 1.05 (0.53-2.10)  | 0.88           |
| Dialysis         | 1.24 (0.56-2.75)  | 0.60           |
| CAD              | 1.26 (0.72-2.22)  | 0.42           |
| Arrhythmia       | 1.22 (0.87-1.70)  | 0.25           |
| CVD              | 1.19 (0.71-2.0)   | 0.50           |
| Lung disease     | 2.18 (0.97-4.87)  | 0.06           |

|                     |                  |       |
|---------------------|------------------|-------|
| PVD                 | 1.14 (0.74-1.74) | 0.56  |
| Prior PCI           | 0.89 (0.64-1.24) | 0.49  |
| Prior CABG          | 0.55 (0.41-0.75) | <.001 |
| Prior Valve surgery | 1.41 (0.87-2.30) | 0.17  |
| Valve in valve      | 0.39 (0.09-1.66) | 0.20  |
| Trans femoral       | 0.46 (0.32-0.65) | <.001 |
| Income Quintile 1   | 1.15 (0.61-2.19) | 0.66  |
| Income Quintile 2   | 0.81 (0.58-1.12) | 0.21  |
| Income Quintile 3   | 0.95 (0.56-1.59) | 0.84  |
| Income Quintile 4   | 1.08 (0.62-1.90) | 0.78  |

AF= Atrial Fibrillation; CABG= Coronary artery bypass graft; CAD= Coronary artery disease;  
 HF= Heart Failure; CI= Confidence Interval; COPD= Chronic Obstructive Lung Disease; CVD=  
 Cerebrovascular disease; DLP= Dyslipidemia; DM= Diabetes mellitus; HTN= Hypertension;  
 HR= Hazard Ratio; ILD= Interstitial Lung Disease; PCI= Percutaneous coronary intervention;  
 PVD= Peripheral vascular disease; TAVR= Trans Catheter Aortic Valve Replacement

**Table S2. Cox models for Readmission within 30-day of post-TAVR Adjusted for Clinical Variables.**

| <b>Parameter</b> | <b>HR (95%CI)</b> | <b>P-value</b> |
|------------------|-------------------|----------------|
| Wait time        | 1.0 (1.0-1.0)     | 0.02           |
| Age              | 1.02 (1.00-1.04)  | 0.08           |
| Female, sex      | 0.80 (0.6-1.06)   | 0.12           |
| Rural Resident   | 1.28 (0.98-1.68)  | 0.07           |
| Charlson Score   | 1.12 (1.02-1.24)  | 0.02           |
| Frailty          | 1.14 (0.84-1.53)  | 0.40           |
| CHF              | 1.32 (1.06-1.64)  | 0.01           |
| DLP              | 0.93 (0.77-1.12)  | 0.43           |
| Dementia         | 1.19 (0.88-1.62)  | 0.26           |
| DM               | 0.96 (0.77-1.21)  | 0.75           |
| HTN              | 1.11 (0.60-2.06)  | 0.73           |
| COPD             | 1.17 (0.94-1.46)  | 0.16           |
| Malignancy       | 0.74 (0.51-1.08)  | 0.12           |
| Renal Disease    | 0.93 (0.65-1.32)  | 0.67           |
| Dialysis         | 1.37 (0.73-2.54)  | 0.33           |
| CAD              | 1.36 (0.87-1.55)  | 0.31           |
| Arrhythmia/AF    | 1.25 (0.87-1.59)  | 0.07           |
| CVD              | 0.92 (0.56-1.52)  | 0.75           |
| Lung disease     | 1.51 (0.63-3.66)  | 0.36           |

|                     |                  |       |
|---------------------|------------------|-------|
| PVD                 | 0.96 (0.68-1.37) | 0.84  |
| Prior PCI           | 0.97 (0.85-1.11) | 0.64  |
| Prior CABG          | 0.86 (0.69-1.08) | 0.19  |
| Prior Valve surgery | 0.75 (0.47-1.18) | 0.21  |
| Valve in valve      | 0.92 (0.57-1.49) | 0.75  |
| Trans Femoral       | 0.45 (0.38-0.54) | <.001 |
| Income Quintile 1   | 1.17 (0.82-1.66) | 0.39  |
| Income Quintile 2   | 0.95 (0.67-1.37) | 0.80  |
| Income Quintile 3   | 1.32 (1.02-1.70) | 0.04  |
| Income Quintile 4   | 1.14 (1.02-1.27) | 0.02  |

AF= Atrial Fibrillation; CABG= Coronary artery bypass graft; CAD= Coronary artery disease;

HF= Heart Failure; CI= Confidence Interval; COPD= Chronic Obstructive Lung Disease; CVD=

Cerebrovascular disease; DLP=Dyslipidemia; DM= Diabetes mellitus; HTN= Hypertension; HR=

Hazard Ratio; ILD= Interstitial Lung Disease; PCI=Percutaneous coronary intervention; PVD=

Peripheral vascular disease; TAVR= Trans Catheter Aortic Valve Replacement.

**Figure S1. Models for Mortality within 30-day of Post-TAVR.**

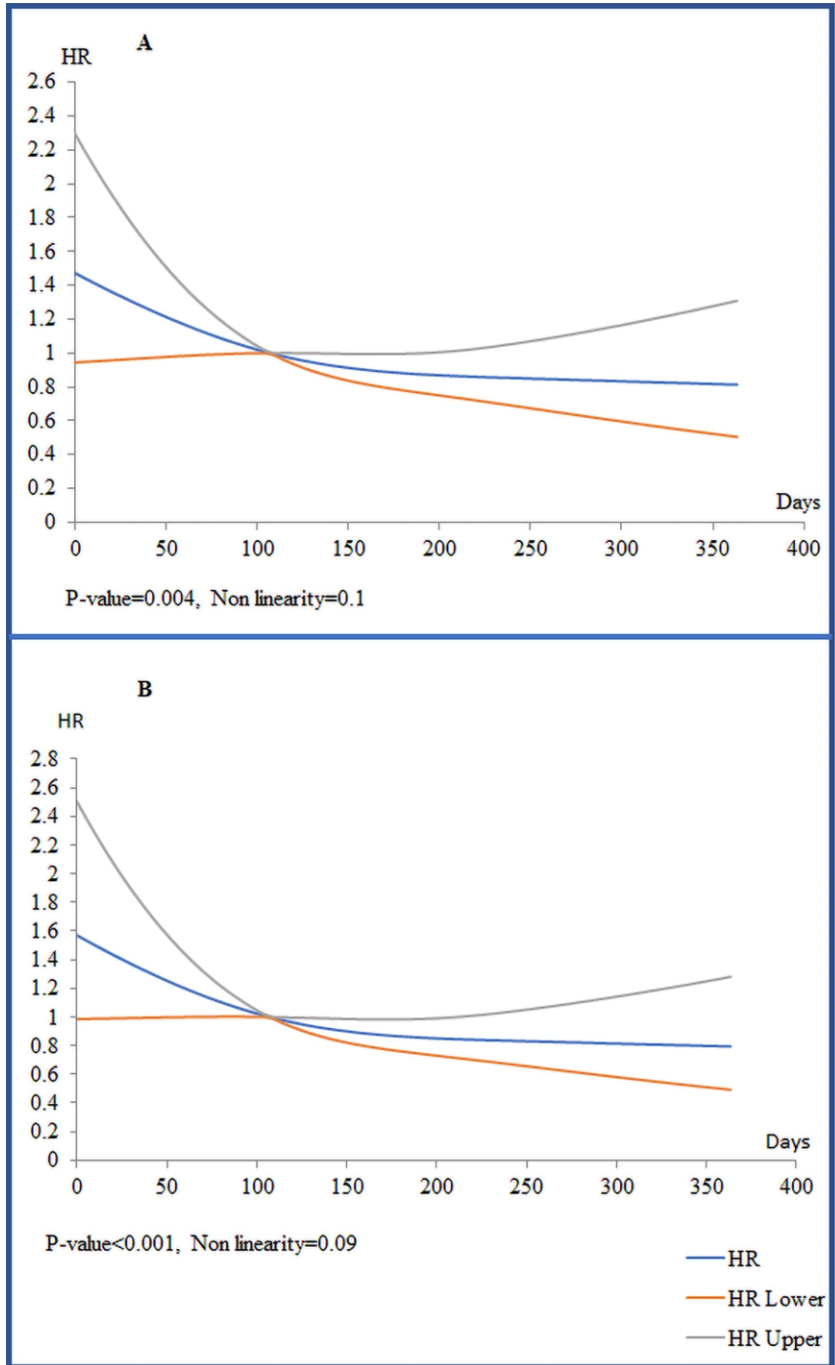

**A.** Adjusted for Clinical Variables and HF on wait-list. **B.** Adjusted for Clinical Variables and All-cause Hospitalization on wait-list. HF= Heart Failure; HR= Hazard Ratio; TAVR= Trans Catheter Aortic Valve Replacement.

**Figure S2. Models for Readmission within 30-day of Post-TAVR.**

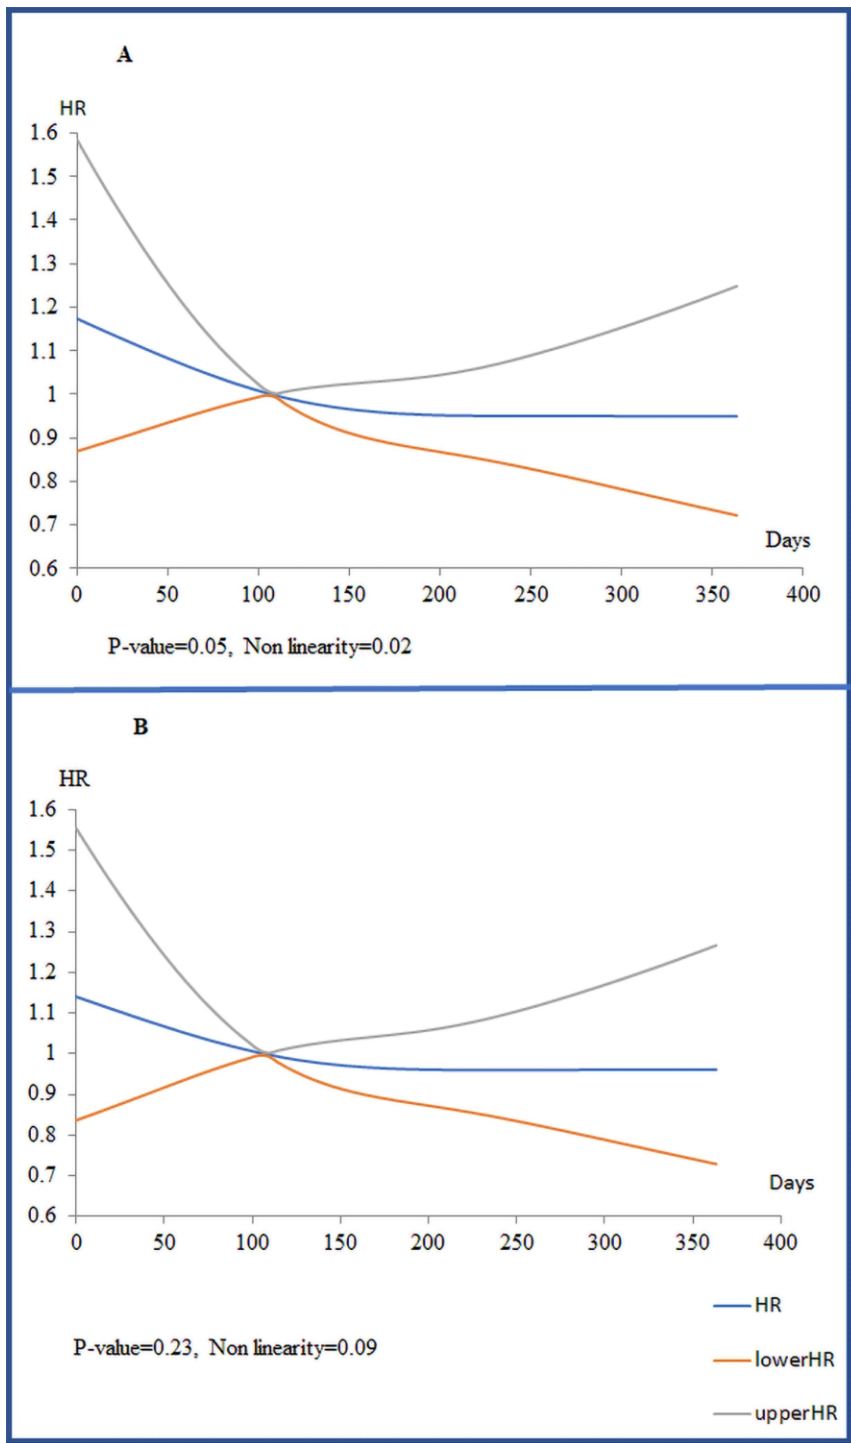

**A.** Adjusted for Clinical Variables and HF on wait-list. **B.** Adjusted for Clinical Variables and All-cause Hospitalization on wait-list. HF= Heart Failure; HR= Hazard Ratio; TAVR= Trans Catheter Aortic Valve Replacement.
